# Supplementary material for: A Non-Parametric Peak Calling Algorithm for DamID-Seq
Source: PubMed Central journal article supplement (PMC4364623; doi:10.1371/journal.pone.0117415), 2015-03-18

Supplemental Figure 4

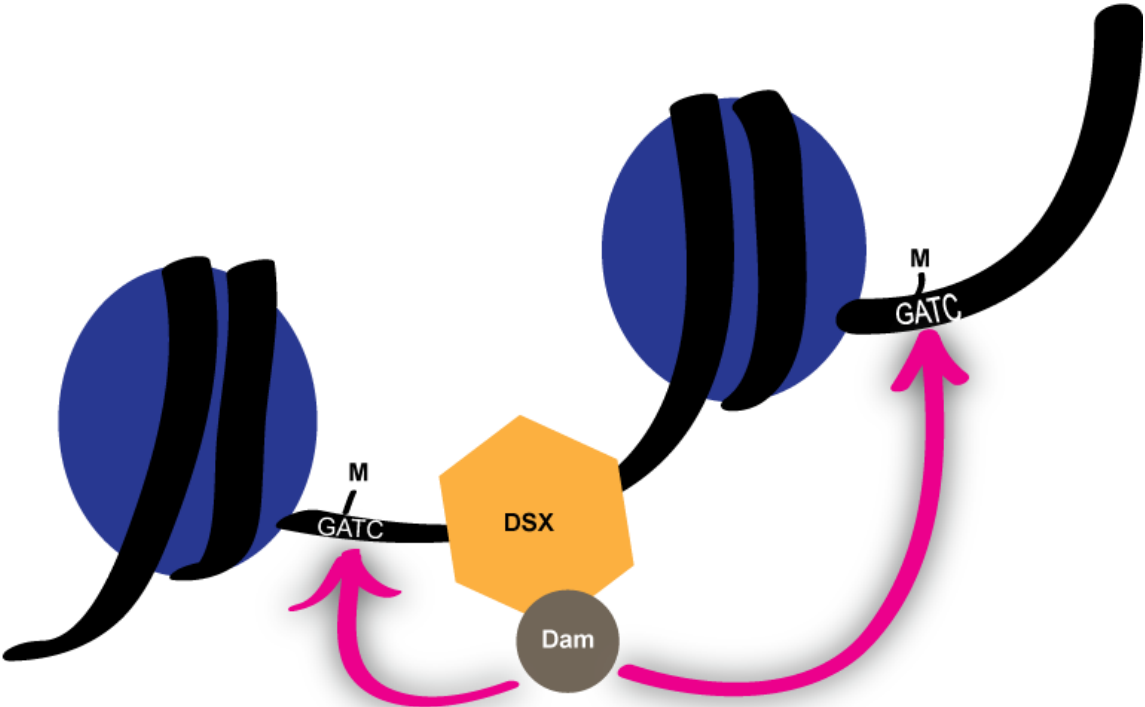

Supplement: pone.0117415.s004.pdf [file pone.0117415.s004.pdf]
