# Supplementary material for: A Non-Parametric Peak Calling Algorithm for DamID-Seq
Source: PubMed Central journal article supplement (PMC4364623; doi:10.1371/journal.pone.0117415), 2015-03-18

# Supplemental Figure A

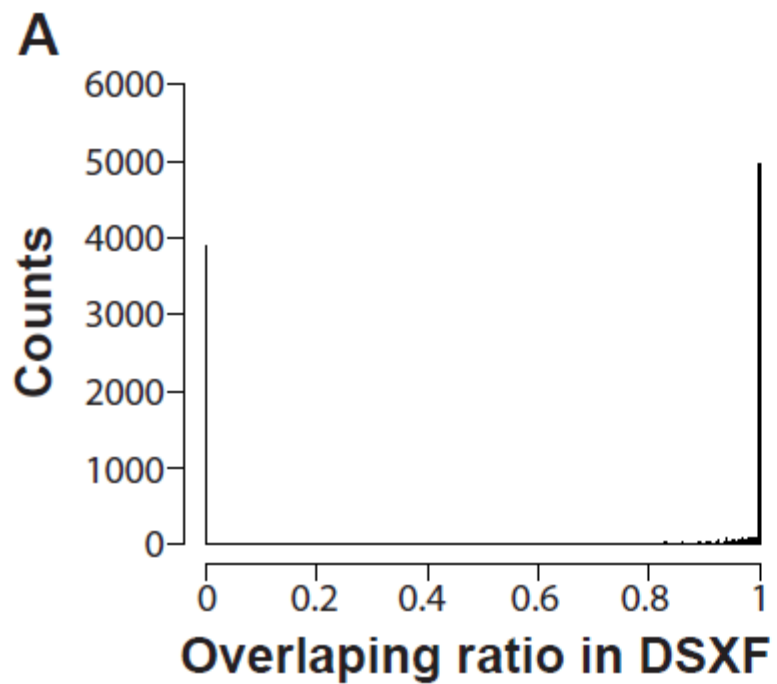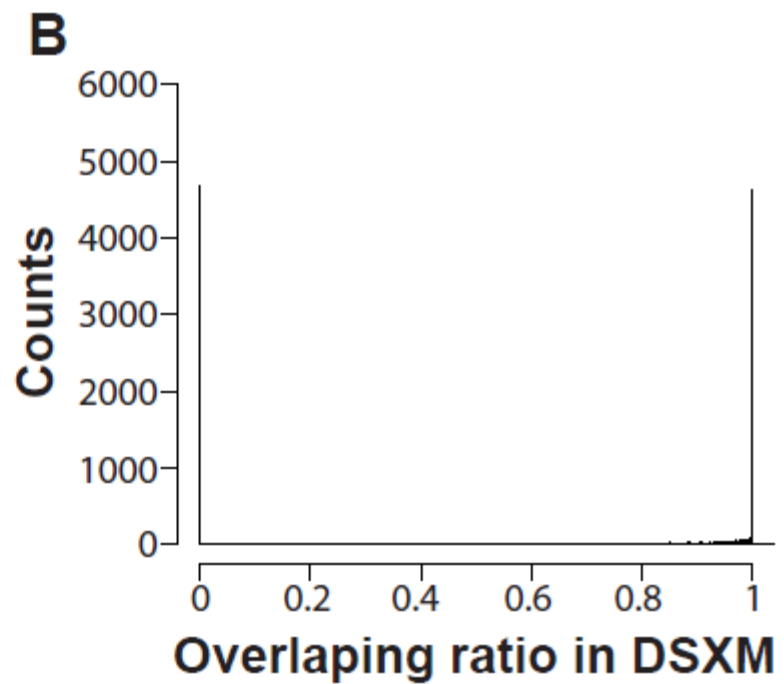

# Supplemental Figure B

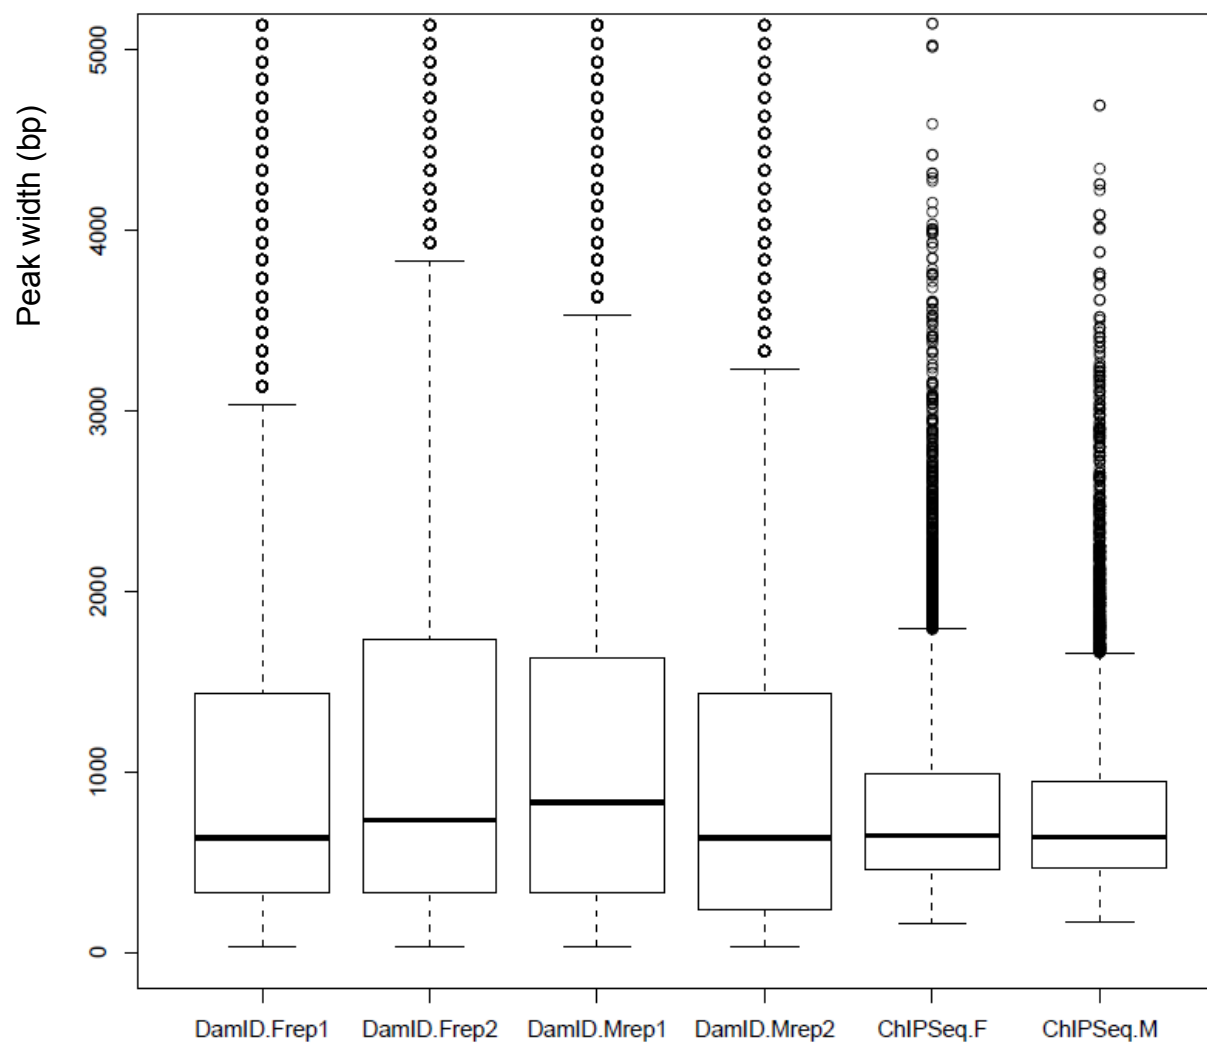

# Supplemental Figure C. Consistent peak locations tagging Hsc70 g

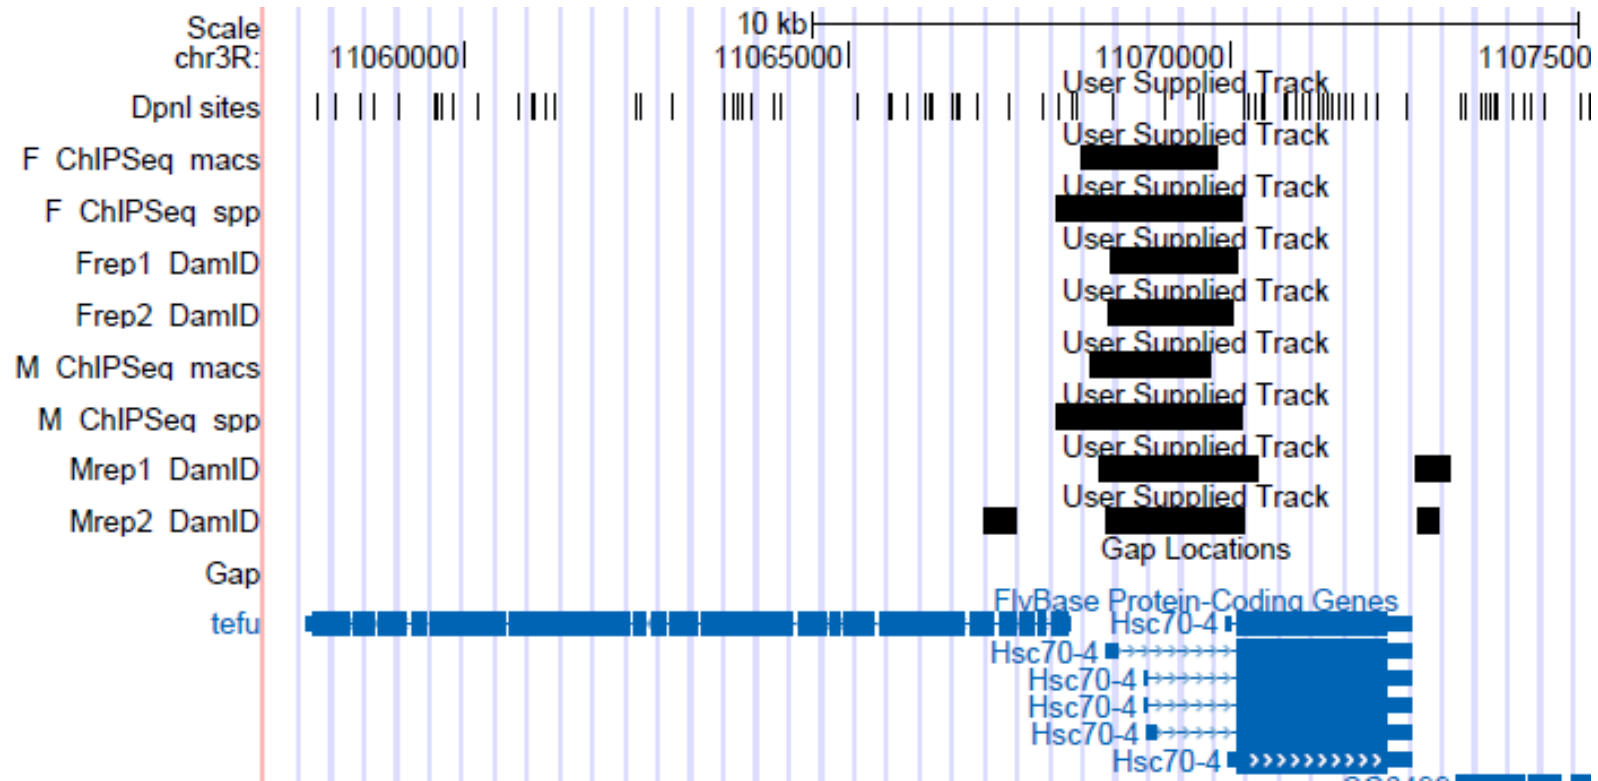

# Supplemental Figure D

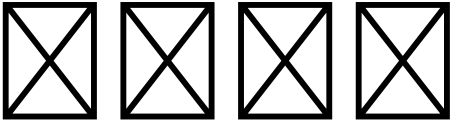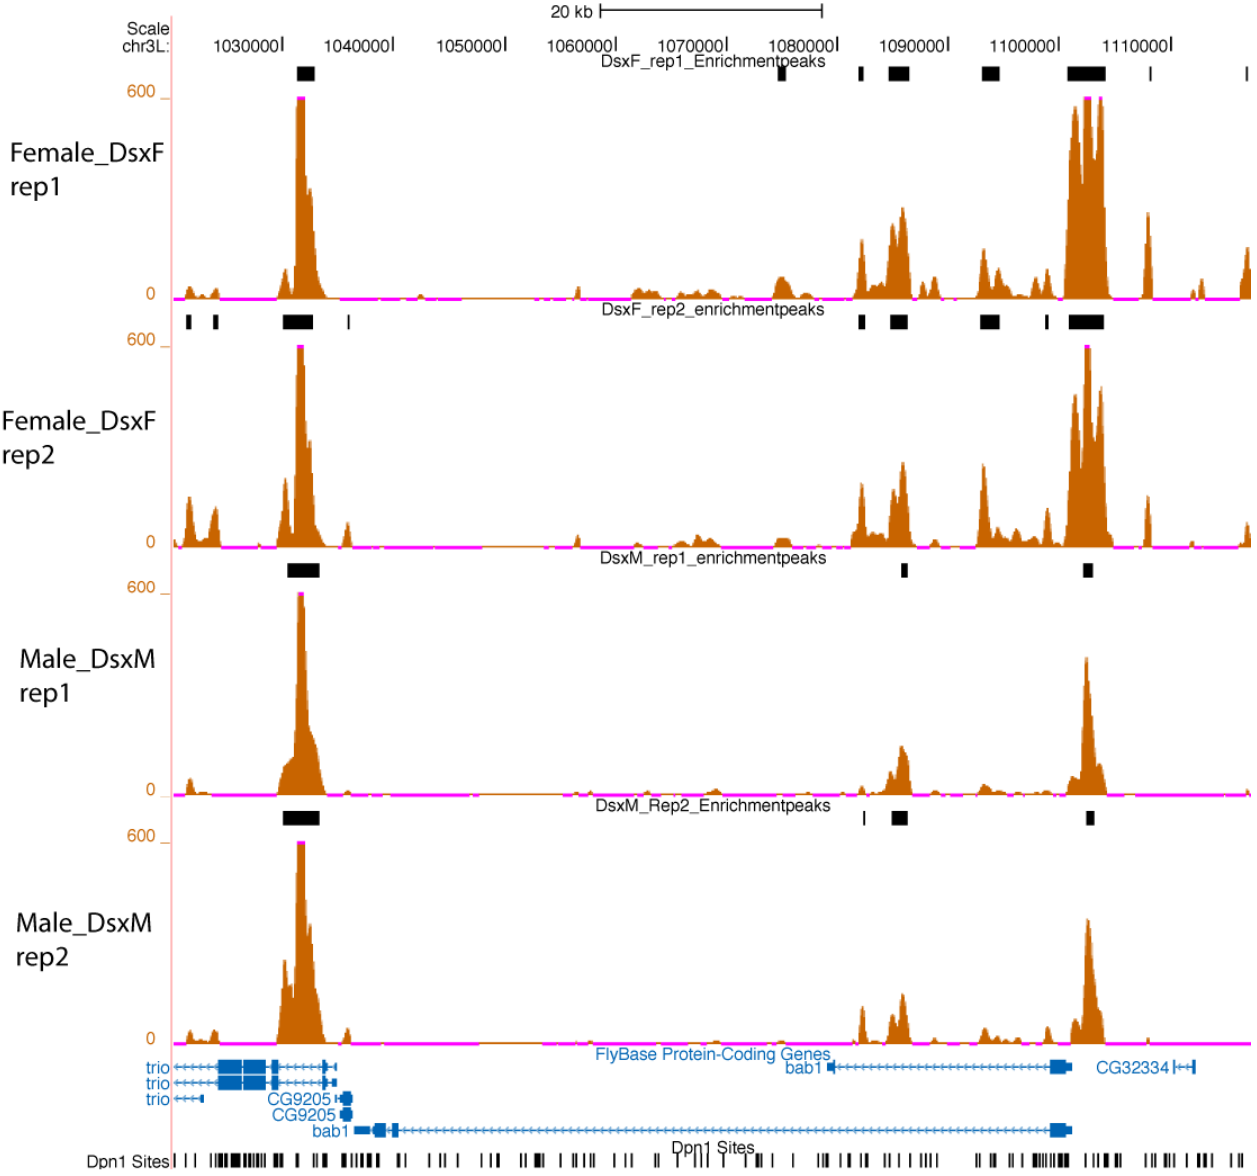

# Supplemental Figure E

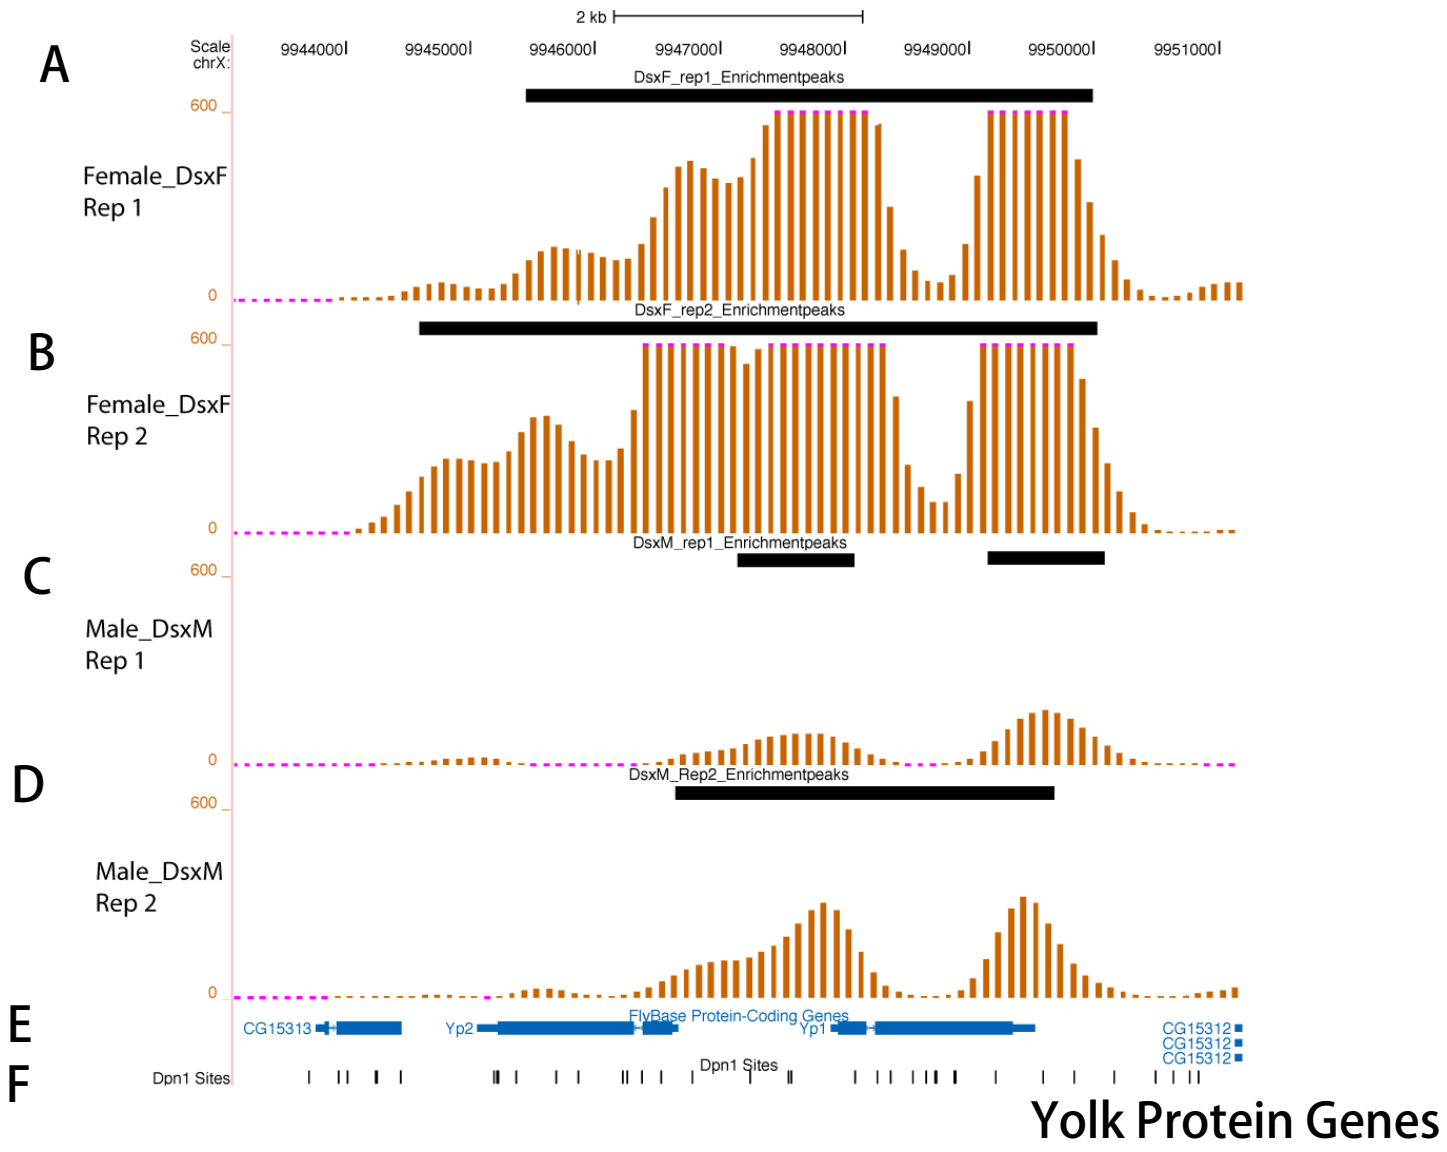

Supplement: pone.0117415.s005.pdf [file pone.0117415.s005.pdf]
